# Supplementary material
Source: PubMed Central journal article supplement (PMC4024903)
Supplement: 1321722111_pnas.201321722SI.pdf [file 1321722111_pnas.201321722SI.pdf]

# Supporting Information

Woodman et al. 10.1073/pnas.1321722111

## SI Materials and Methods

**Strain Construction.** Sister chromatid cohesion (SCC) genes, *SCC2* and *SCC4*, were FLAG epitope tagged as described (1). A carboxyl-terminal fusion of *SCC2* to an auxin-inducible degron (AID) cassette (2) was constructed by using standard approaches and pMK43 (provided by the National Bioresources Program of the MEXT, Japan). *CDC45* was epitope tagged by transformation with a plasmid containing a carboxyl-terminal region of *CDC45* fused to three HA epitopes (pRS306-*CDC45*-3XHA). Carboxyl-terminal V5 tagging of *MCD1* was constructed by using standard approaches and pFA6a-6xGLY-V5-hphMX4 (Addgene). Deletions spanning *Scs2* amino acids 143–155 or 2–155 were constructed as described (3) by using multiple,  $\leq 700$  base-pair (bp) overlapping DNA fragments that deleted *SCC2* nucleotides 436–474 and AfeI/BstEII-digested pJW4, in the case of the  $\Delta 143$ –155 mutant, or deleted *SCC2* nucleotides 4–474 and BamHI-BstEII-digested pJW4, in the case of the  $\Delta 2$ –155 mutant. pJW4 contains *SCC2* in YCplac22. The reassembled vectors containing *scc2* $\Delta 143$ –155, pJW10, or *scc2* $\Delta 2$ –155, pJW16, were introduced by transformation into CPY18, whose sole copy of *SCC2* resides on a plasmid expressing *URA3*. Cells were then plated on 8 mM 5-fluoro-otic acid to screen for the ability of cells to lose wild-type *SCC2*. To construct a temperature-sensitive *SCC2* degron, a 217-bp fragment of the 5' portion of *SCC2* was amplified by PCR with the addition of 5' XbaI and 3' NotI restriction sites, respectively, and then cloned into a yeast integrating vector, pRS306tet (EUROSCARF), to create a doxycycline-regulated dihydrofolate reductase (DHFR) fusion to the 5' region of *SCC2*, creating plasmid, pNL6. Following linearization, the fusion construct was integrated at the endogenous *SCC2* locus by yeast transformation and selection for uracil prototrophs. The addition of 10  $\mu$ g/mL doxycycline and shift to growth at the restrictive temperature (37 °C) for 1 h halts td-*SCC2* expression and facilitates rapid turnover of *Scs2*, respectively (4).

**Yeast Cell Culture and Cell Cycle Staging.** Unless otherwise indicated, cells were released from  $\alpha$ F by washing twice in medium containing 0.1 mg/mL protease from *Streptomyces griseus* (Sigma-Aldrich) and returned to growth in protease-containing medium. Proteasome function was inhibited in  $\Delta$ erg6 mutants following treatment with 50 mM MG132 in DMSO for 3 h (5). Indole-3-acetic acid was added to culture medium at a final concentration of 2.5 mM in 1% DMSO to induce *Scs2*-AID turnover.

**Chromatin Fractionation.** After incubation in 100 mM Pipes/KOH at pH 9.4,  $4 \times 10^9$  cells were spheroplasted with 500  $\mu$ g/mL Zymolyase-100T in 0.4 M sorbitol/50 mM KPO<sub>4</sub> in the presence of the following protease inhibitors: 1 mM benzamidine, 0.5 mM sodium metabisulfite, 2.7  $\mu$ g/mL pepstatin A, 4 mg/mL leupeptin, 1 mM phenylmethanesulfonyl fluoride and phosphatase inhibitors (2 mM sodium orthovanadate, 10 mM NaF, and 10 mM  $\beta$ -glycerophosphate). Spheroplasts were resuspended in an equal cell pellet volume and lysed with 0.25% Triton X-100 to create a whole cell extract (WCE). Lysates were then centrifuged at  $12,000 \times g$  for 10 min on 30% (wt/vol) sucrose gradients. As an added control, pellets were digested with 5 U DNase I, releasing chromatin-bound proteins into a soluble fraction, termed SN2. DNase I digestions were in 10 mM Tris-HCl, 2.5 mM MgCl<sub>2</sub>, 0.5 mM CaCl<sub>2</sub> at pH 7.6 at 37 °C for 10 min. WCEs, soluble proteins from the supernatant (SN1), and the re-suspended chromatin bound proteins (pellet) were then analyzed via immunoblot.

**In Vitro Cleavage Assay.** To immuno-isolate *Scs2*, protein A magnetic beads (Invitrogen), prebound to FLAG antibody at a ratio of 2–5  $\mu$ g of FLAG serum per 10  $\mu$ L of a 50% bead suspension by overnight incubation at 4 °C, were then incubated with WCE at 4 °C for 2 h and washed thoroughly six times in 50 mM Hepes, 100 mM KCl, 2.5 mM MgCl<sub>2</sub>, 10% (vol/vol) glycerol, 0.1% Triton X-100, 0.1% Tween 20, and 300 mM NaCl that also contained protease and phosphatase inhibitors with 10 min between washes. Beads were then incubated with a second WCE lacking FLAG-tagged proteins for 2 h at 4 °C and subsequently washed as described above. Proteins were eluted from beads in 1% SDS by boiling for 5 min, and eluates were analyzed via immunoblot. Where indicated, WCEs ( $\sim 40$   $\mu$ g/mL total protein) were treated with 200 U of lambda phosphatase (New England Biolabs) in a 100- $\mu$ L reaction incubated at 30 °C for 0.5–1 h.

**Immunoblot Quantitation.** SDS polyacrylamide gels (6%, vol/vol) were used to distinguish full-length and cleaved *Scs2* species. Proteins were transferred to polyvinylidene difluoride membrane at 100 V for 1 h. Primary and secondary antibody solutions contained 1% BSA, 1% dry nonfat milk, and 0.1% Tween 20 in PBS. Mouse monoclonal FLAG (Sigma) and HA (Roche) antibodies, rabbit *Scs2* polyclonal serum (this study), rabbit G6PDH (Sigma), and mouse polyclonal Myc serum (Santa Cruz) were used at 5,000-, 5,000-, 500-, 100,000-, and 500-fold dilutions, respectively. Goat anti-mouse and anti-rabbit horseradish peroxidase-conjugated secondary antibodies (BioRad) were used at 1:2,500 and 1:10,000, respectively. Quantitation was performed by using the BioRad ChemiDoc System and ImageLab software.

**Antibody Production.** An approximate 480-bp fragment encoding amino acids 40–200 of *Scs2* was amplified by PCR as a BamHI-SalI fragment and cloned into BamHI, SalI-digested pGEX-6P-1 GST bacterial expression vector (GE Healthcare). Following a 3-h induction with 0.8 mM IPTG, GST-*Scs2* was purified from Rosetta (Novagen) cell extracts by using glutathione-sepharose beads (Amersham Biosciences). GST-*Scs2* was eluted from the beads by the addition of glutathione (6.15 mg/mL), whereas an *Scs2* polypeptide lacking GST was obtained by treatment of GST-*Scs2*-bound beads with PreScission protease (GE Healthcare). Rabbits were first inoculated with the intact GST-*Scs2* and with *Scs2* alone in subsequent boosts, performed by Covance Research Products.

**Mass Spectrometry.** Bead-eluted *Scs2*-FLAG samples were loaded onto a 1.5-mm-thick NuPAGE Bis-Tris 4–12% gradient gel (Invitrogen). The BenchMark Protein Ladder (Invitrogen) was used as a protein molecular mass marker. The electrophoretic run was performed by using Mes SDS running buffer, in an X-Cell II mini gel system (Invitrogen) at 200 V, 120 mA, and 25 W per gel for 30 min. The gel was stained by using SimplyBlue SafeStain (Invitrogen) stain and destained with water according to the manufacturer's protocol. After excision, gel pieces were destained in 200  $\mu$ L of 25 mM ammonium bicarbonate in 50% vol/vol acetonitrile (ACN) for 15 min and washed twice with 200  $\mu$ L of 50% (vol/vol) ACN. Disulfide bonds in proteins were reduced by incubation in 10 mM DTT at 60 °C for 30 min, and cysteine residues were alkylated with 20 mM iodoacetamide in the dark at room temperature for 45 min. Gel pieces were subsequently washed with 100  $\mu$ L of distilled water followed by the addition of 100  $\mu$ L of ACN and dried by SpeedVac (Savant ThermoFisher). One hundred nanograms of trypsin was then added

to each sample and allowed to rehydrate the gel plugs at 4 °C for 45 min and incubated at 37 °C overnight. The tryptic mixtures were acidified with formic acid (FA) to a final concentration of 1%. Peptides were extracted two times from the gel plugs by using 1% FA in 50% ACN. The collected extractions were pooled with the initial digestion supernatant, and the volume was reduced by using SpeedVac. Samples were measured on an LTQ Orbitrap XL mass spectrometer (Thermo Fisher Scientific) coupled to an Eksigent nanoLC-2D system through a nano-electrospray LC-MS interface. Eight microliters of sample was injected into a 10- $\mu$ L loop by using the autosampler. To desalt the sample, material was flushed out of the loop and loaded onto a trapping column (ZORBAX 300SB-C18, dimensions 5  $\times$  0.3 mm  $\times$  5  $\mu$ m) and washed with 5% (vol/vol) ACN and 0.1% FA at a flow rate of 10  $\mu$ L/min for 5 min. At this time, the trapping column was put online with the nano-pump at a flow rate of 350 nL/min. The mobile phase included water with 0.1% FA (solvent A) and 99.9% ACN with 0.1% FA (solvent B). A 90-min gradient from 6% ACN to 40% (vol/vol) ACN was used to separate the peptides. Peptides were separated on a house-made 100  $\mu$ m inner diameter  $\times$  150 mm fused silica capillary packed with Jupiter C<sub>18</sub> resin (Phenomex). Data acquisition was performed by using

the instrument supplied Xcalibur (version 2.0.6) software. The mass spectrometer was operated in the positive ion mode; the peptide ion masses were measured in the Orbitrap mass analyzer, whereas the peptide fragmentation was performed by using either higher energy collisional dissociation (HCD) or electron transfer dissociation (ETD) in the linear ion trap analyzer by using default settings. Ten most intense ions were selected for fragmentation in each scan cycle; fragmented masses were excluded from further sequencing for 90 s.

MS/MS spectra were extracted from raw data files and converted into Mascot generic format (MGF) files by using a PAVA script (University of California, San Francisco). These mgf files were then independently searched against the *Saccharomyces cerevisiae* subset of the SwissProt database by using an in-house Mascot server (Version 2.2.06, Matrix Science). Mass tolerances were  $\pm$ 15 ppm for MS peaks, and  $\pm$ 0.6 Da for MS/MS fragment ions. For all HCD spectra, fragment ion tolerances were set to 0.05 Da. Trypsin specificity was used, allowing for one missed cleavage. Met oxidation, protein N-terminal acetylation, and peptide N-terminal pyroglutamic acid formation were allowed for variable modifications while carbamidomethyl of Cys was set as a fixed modification.

1. Kogut I, Wang J, Guacci V, Mistry RK, Megee PC (2009) The *Scs2/Scs4* cohesin loader determines the distribution of cohesin on budding yeast chromosomes. *Genes Dev* 23(19):2345–2357.
2. Nishimura K, Fukagawa T, Takisawa H, Kakimoto T, Kanemaki M (2009) An auxin-based degron system for the rapid depletion of proteins in nonplant cells. *Nat Methods* 6(12):917–922.
3. Gibson DG, et al. (2009) Enzymatic assembly of DNA molecules up to several hundred kilobases. *Nat Methods* 6(5):343–345.
4. Dohmen RJ, Wu P, Varshavsky A (1994) Heat-inducible degron: A method for constructing temperature-sensitive mutants. *Science* 263(5151):1273–1276.
5. Hwang GW, Furuchi T, Naganuma A (2002) A ubiquitin-proteasome system is responsible for the protection of yeast and human cells against methylmercury. *FASEB J* 16(7):709–711.

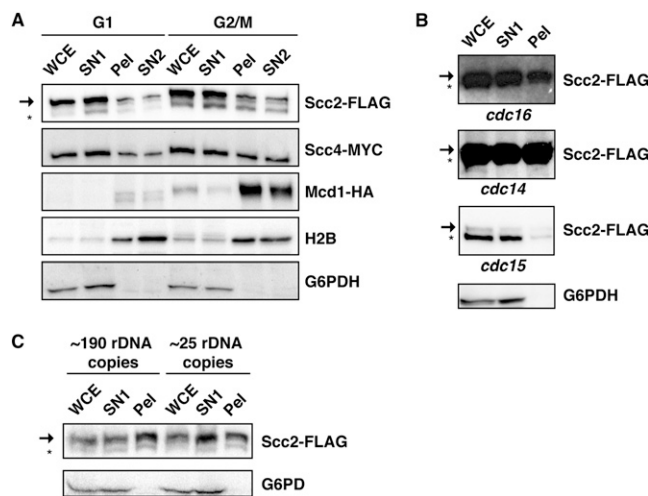

**Fig. S1.** Scc2 chromatin association is cell cycle regulated. (A) Scc2-FLAG Scc4-MYC Mcd1-HA (1891-32C) cells were staged in G<sub>1</sub> or M by using  $\alpha$ F or a conditional *cdc16* mutant (37 °C, 3 h), respectively, and then subjected to chromatin fractionation. Levels of the indicated proteins were determined by immunoblotting WCE or fractions of nonchromatin bound supernatants (SN1), chromatin-bound pellets (Pel), or the supernatant generated by DNase I digestion of pellets (SN2). Chromatin-bound Mcd1 and H2B and nonchromatin-bound glucose-6-phosphate dehydrogenase (G6PDH) serve as fractionation controls. Release of proteins into SN2 by DNase I treatment of pellets indicates the chromatin dependence of pellet fraction enrichment. The arrow and asterisk indicate slower and faster migrating Scc2 species, respectively. (B) Conditional *cdc16*, *cdc14*, or *cdc15* mutant cells (PMY679, PVY1, and 1886-24A, respectively) containing Scc2-FLAG were  $\alpha$ F-arrested, released into fresh media at 37 °C for 3 h, and then fractionated and analyzed via immunoblot by using FLAG and G6PDH antibodies. (C) Immunoblots of chromatin fractionations of asynchronously growing cells having either ~190 or ~25 copies of rDNA (MTY084 and MTY086, respectively) are shown by using FLAG and G6PDH antibodies.



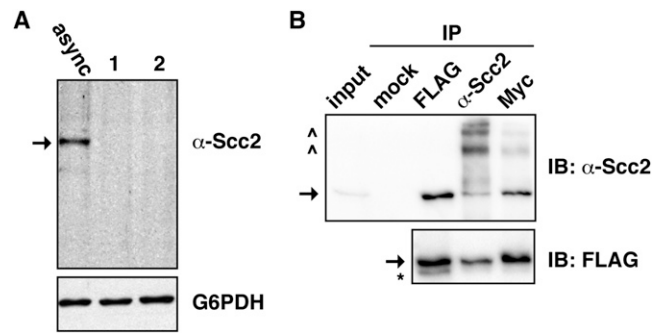

**Fig. 53.** A rabbit polyclonal serum is specific for Scc2. (A) WCE of asynchronously growing td-SCC2 control cells (2650) and two biological replicates (labeled 1 and 2) of these cells treated with 10  $\mu$ g/mL doxycycline to inhibit td-SCC2 expression and shifted to growth at 37  $^{\circ}$ C for 1 h to induce Scc2 turnover were subjected to immunoblot by using a rabbit polyclonal serum raised against amino acids 40–200 of *S. cerevisiae* Scc2, or anti-G6PDH antibody as a loading control. The arrow indicates full-length Scc2. (B) An extract of Scc2-FLAG Scc4-13Myc cells [1891-32C, input (2%)] was subjected to reciprocal coimmunoprecipitation with the indicated antibodies [none (mock), FLAG, rabbit polyclonal Scc2 serum, or Myc], followed by immunoblot with either the rabbit polyclonal Scc2 serum (*Upper*) or anti-FLAG antibody (*Lower*). The arrow, asterisk, and caret indicate full-length, cleaved, and phosphorylated forms of Scc2, respectively.

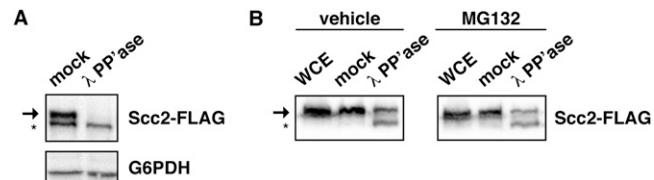

**Fig. 54.** Scc2 cleavage is independent of vacuolar proteases and the proteasome. (A) Mock treatment or  $\lambda$  phosphatase treatment of WCE prepared from asynchronously growing *pep4-3 prb1-1122 prc1-407* Scc2-FLAG cells (MTY046) was immunoblotted with FLAG and G6PDH antibodies. The arrow and asterisk indicate full-length and cleaved Scc2 species, respectively. (B) Scc2-FLAG is cleaved upon phosphatase treatment in WCE from asynchronous  $\Delta$ *erg6* cells (MTY096) treated with DMSO or proteasome inhibitor MG132.



**Table S1. *Saccharomyces cerevisiae* strains**

| Strain   | Relevant genotype                                                                                                                              | Source     |
|----------|------------------------------------------------------------------------------------------------------------------------------------------------|------------|
| A364a*   |                                                                                                                                                |            |
| 1891–32C | <i>MATa</i> SCC2-6His-3FLAG::kanMX <i>MCD1-6HA</i> SCC4-6His-13Myc::clonNAT <i>his3 cdc16-1 ura3 bar1 gal1</i>                                 | This study |
| PMY679   | <i>MATa</i> SCC2-6His-3FLAG::kanMX <i>cdc16-1 his3Δ200 MCD1-6HA ura3 bar1 gal1</i>                                                             | This study |
| 1891–36D | <i>MATa</i> SCC4-6His-13Myc::clonNAT <i>his3 leu2 MCD1-6HA ura3 bar1 gal1</i>                                                                  | This study |
| PVY1     | <i>MATa</i> SCC2-6His-3FLAG::kanMX <i>cdc14-1 ura3 his3Δ200 leu2 trp1 bar1</i>                                                                 | This study |
| 1886–24A | <i>MATa</i> SCC2-6His-3FLAG::kanMX <i>cdc15-2 MCD1-6HA his3Δ1 leu2 trp1 bar1 cyh2</i>                                                          | This study |
| PMY715   | <i>MATa</i> SCC2-6His-3FLAG::kanMX <i>SMC3-6MYC::his5+ CDC45-3HA::URA3 ura3 leu2 bar1 trp1</i>                                                 | This study |
| MTY096   | <i>MATa</i> SCC2-6His-3FLAG::clonNAT <i>Δerg6::kanMX ura3 leu2 bar1 his3Δ200</i>                                                               | This study |
| W303*    |                                                                                                                                                |            |
| 2650     | <i>MATa ura3-1 URA3::tetdeg-scc2 his3-11,15 leu2-3,112 LEU2::pCM245 TetR-SSN6 HIS3::pRS403HIS3::pRS403-188</i><br><i>CMV tTA ade2-1 trp1-1</i> | This study |
| MTY084   | <i>MATa</i> SCC2-6His-3FLAG::kanMX <i>ade2-1 ura3-1 trp1-1 leu2-3,112 his3-11 can1-100 Δfob1::HIS3 (~190 rDNA</i><br><i>copies)</i>            | This study |
| MTY086   | <i>MATa</i> SCC2-6His-3FLAG:: kanMX <i>ade2-1 ura3-1 trp1-1 leu2-3,112 his3-11 can1-100 Δfob1::HIS3 (~25rDNA</i><br><i>copies)</i>             | This study |
| JWY139   | <i>MATa Δscc2::clonNAT ura3 trp1-1 leu2-3,112 his3 can1-100 GAL psi+ SMC3-6MYC::his5+ pJW10 and pPCM102</i><br><i>(SCC2/URA3/CEN4/ARS)</i>     | This study |
| JWY140   | <i>MATa Δscc2::clonNAT ura3 trp1-1 leu2-3,112 his3 can1-100 GAL psi+ SMC3-6MYC::his5+ pJW4 and pPCM102</i><br><i>(SCC2/URA3/CEN4/ARS)</i>      | This study |
| JWY154   | <i>MATa Δscc2::clonNAT ura3 trp1-1 leu2-3,112 his3 can1-100 GAL psi+ SMC3-6MYC::his5+ YCplac22 and pPCM102</i><br><i>(SCC2/URA3/CEN4/ARS)</i>  | This study |
| JWY211   | <i>MATa Δscc2::clonNAT ura3 trp1-1 leu2-3,112 his3 can1-100 GAL psi+ SMC3-6MYC::his5+ pJW16 and pPCM102</i><br><i>(SCC2/URA3/CEN4/ARS)</i>     | This study |
| JWY143   | <i>MATa</i> SCC2-6His-AID::KAN <i>ade2-1 his3-11,15 leu2-3,112 trp1-1 can1-100 SCC4-6His-3HA::hph Δbar1::LEU2 pJW4</i>                         | This study |
| JWY148   | <i>MATa</i> SCC2-6His-AID::KAN <i>ade2-1 his3-11,15 leu2-3,112 trp1-1 can1-100 SCC4-6His-3HA::hph Δbar1::LEU2</i><br><i>pJW10</i>              | This study |
| 1875–39B | <i>MATa</i> <i>scc2-4 leu2 ura3 his3 SCC3-18MYC::TRP1 ade2-1 can1-100</i>                                                                      | This study |
| JWY214   | <i>MATa ura3-1::ADH1-AtTIR1-9MYC URA3 SCC2-6HIS-AID::clonNAT trp1-1 can1-100 SCC4-6HIS-3FLAG::KAN</i><br><i>MCD1-6G-V5::hph pJW4</i>           | This study |
| JWY215   | <i>MATa ura3-1::ADH1-AtTIR1-9MYC URA3 SCC2-6HIS-AID::clonNAT trp1-1 can1-100 SCC4-6HIS-3FLAG::KAN</i><br><i>MCD1-6G-V5::hph pJW16</i>          | This study |
| S288C*   |                                                                                                                                                |            |
| MTY046   | <i>MATa</i> SCC2-6His-3FLAG:: kanMX <i>pep4-3 prb1-1122 prc1-407 leu2 trp1 ura3-52</i>                                                         | This study |

\*Strain background.
